# Supplementary material for: Superparamagnetic core–shell electrospun scaffolds with sustained release of IONPs facilitating in vitro and in vivo bone regeneration
Source: Royal Society of Chemistry journal article supplement (doi:10.1039/d1tb01261d), 2021-01-01
Supplement: d1tb01261d1.pdf [file d1tb01261d1.pdf]

Supplementary Information

**Superparamagnetic Core–Shell Electrospun Scaffolds with Sustained Release of IONPs Facilitating *in vitro* and *in vivo* Bone Regeneration**

Shuying Hu<sup>a</sup>, Hanbang Chen<sup>a</sup>, Fang Zhou<sup>a</sup>, Jun Liu<sup>a</sup>, Yunzhu Qian<sup>b</sup>, Ke Hu<sup>c</sup>, Jia Yan<sup>a</sup>, Zhuxiao Gu<sup>d</sup>, Zhaobin Guo<sup>e</sup>, Feimin Zhang<sup>\*a</sup>, and Ning Gu<sup>f</sup>

<sup>a</sup>Jiangsu Key Laboratory of Oral Diseases, Department of Prosthodontics, The Affiliated Stomatological Hospital of Nanjing Medical University, Nanjing Medical University, Nanjing 210029, China

<sup>b</sup>Center of Stomatology, The Second Affiliated Hospital of Soochow University, Suzhou 215004, China

<sup>c</sup>Laboratory of Oral Regenerative Medicine Technology, School of Biomedical Engineering and Informatics, Department of Biomedical Engineering, Nanjing Medical University, Nanjing 210000, China

<sup>d</sup>Jiangsu Key Laboratory for Science and Applications of Molecular Ferroelectrics, Southeast University, Nanjing 211189, China

<sup>e</sup>Institute for Nanobiotechnology, Johns Hopkins University, Baltimore, 21218, United States

<sup>f</sup>State Key Laboratory of Bioelectronics, Jiangsu Key Laboratory for Biomaterials and Devices, School of Biological Science and Medical Engineering, Southeast University, Nanjing 210009, China

**\*Corresponding Author**

Feimin Zhang

Fax: +86-25-86516414

E-mail:

fmzhang@njmu.edu.cn

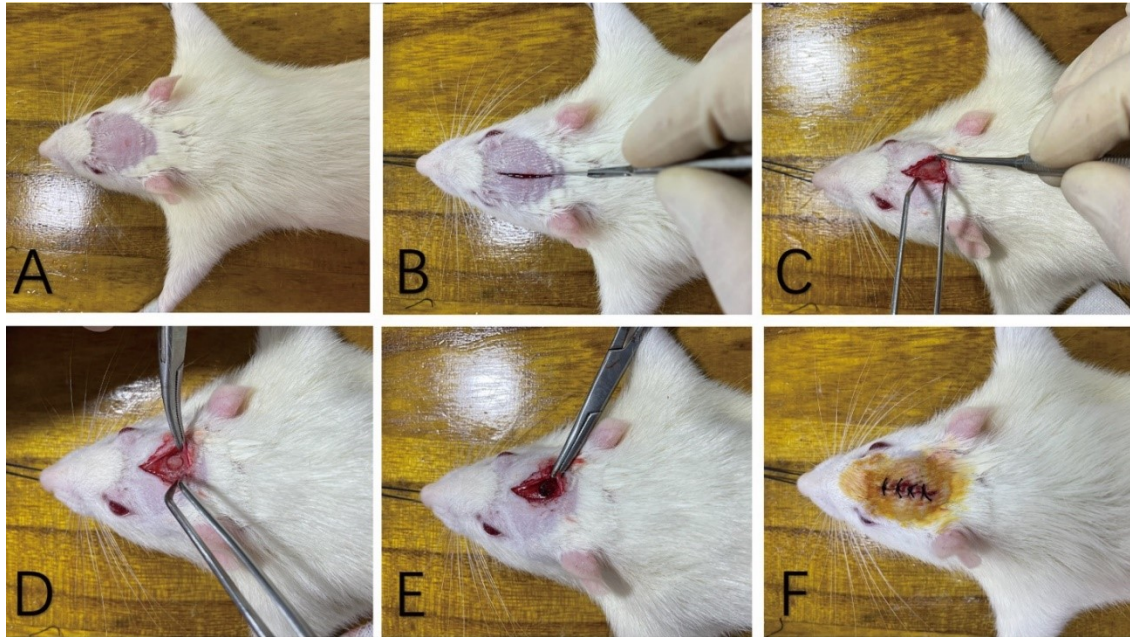

**Fig. S1** Surgical steps of preparation of the calvarial defect model and scaffold implantation in rats. (A) The operation area was shaved and sterilized. (B) A sagittal incision was made along the middle line. (C) The periosteum was softly separated, and the calvarium was adequately exposed. (D) Full-thickness calvarial bone of 5-mm diameter was removed on the right side of the skull. (E) A scaffold was implanted. (F) The periosteum and skin were sutured.

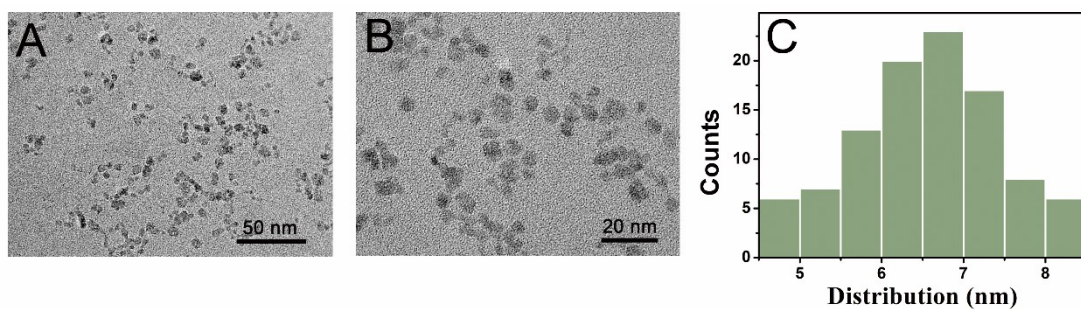

**Fig. S2** TEM images (A, B) and size distribution (C) of  $\gamma$ -Fe<sub>2</sub>O<sub>3</sub> nanoparticles

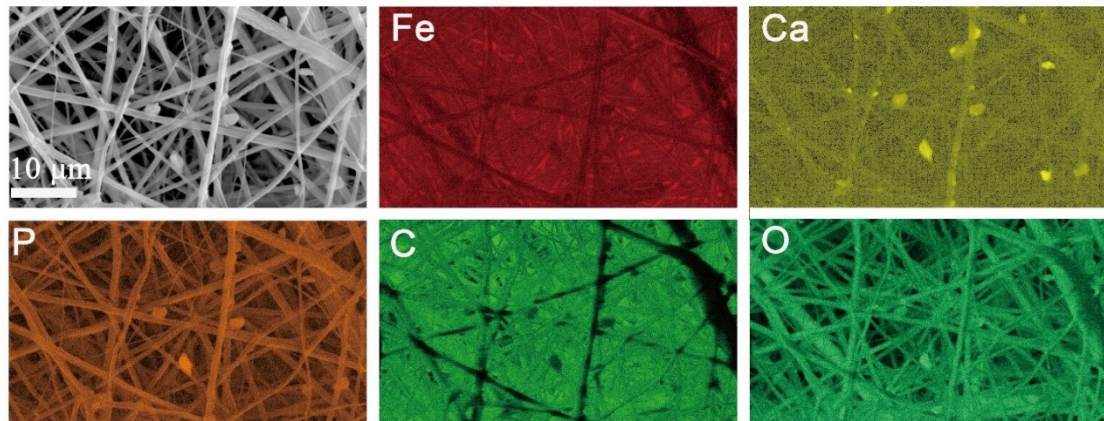

**Fig. S3** EDS mapping of distribution of elements in PPT-Fe scaffolds

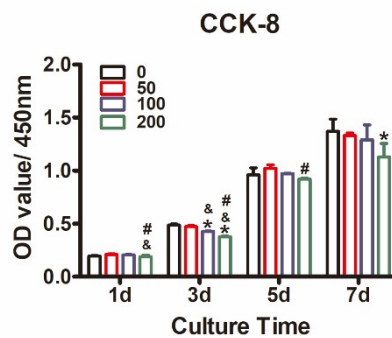

**Fig. S4** Cell proliferation of rADSCs incubated with  $\gamma\text{-Fe}_2\text{O}_3$  at different concentrations measured by the CCK-8 assay (\*  $p < 0.05$  vs. 0  $\mu\text{g/mL}$ ; &  $p < 0.05$  vs. 50  $\mu\text{g/mL}$ ; #  $p < 0.05$  vs. 100  $\mu\text{g/mL}$ )

**Table S1** Primer sequences for RT-PCR analysis

| Gene         | Forward primer (5'–3') | Reverse primer (5'–3') |
|--------------|------------------------|------------------------|
| GAPDH        | GGCACAGTCAAGGCTGAGAATG | ATGGTGGTGAAGACGCCAGTA  |
| <i>alp</i>   | CGAGCAGGAACAGAAGTTTGC  | GAATCCGACCCACGGAGG     |
| <i>bmp2</i>  | CAGTGGGAGAGCTTTGATGT   | ACCTGGCTTCTCCTCTAAGT   |
| <i>coll</i>  | GAAGACCTGGCGAGAGAGGA   | TCAATCCATCCAGACCGTTG   |
| <i>runx2</i> | GCCGGGAATGATGAGAACTA   | GGACCGTCCACTGTCACTTT   |
